# Supplementary material for: Crystal transformation synthesis of a highly stable phosphonate MOF for selective adsorption of CO2
Source: Royal Society of Chemistry journal article supplement (doi:10.1039/c2ce26701b), 2012-11-06
Supplement: c2ce26701b.pdf [file c2ce26701b.pdf]

Electronic Supplementary Information (ESI) for:

## Crystal transformation synthesis of high stable porous phosphonate-based MOF for selective adsorption of CO<sub>2</sub>

Fupeng Zhai, Qingshu Zheng, Zhenxia Chen\*, Yun Ling, Xiaofeng Liu, Linhong  
Weng, Yaming Zhou\*

|                                                                                                                                                                                           |    |
|-------------------------------------------------------------------------------------------------------------------------------------------------------------------------------------------|----|
| 1. General .....                                                                                                                                                                          | 2  |
| 2. Experiment details .....                                                                                                                                                               | 2  |
| 3. Single-crystal X-ray crystallography .....                                                                                                                                             | 4  |
| Table S1. Selected bond lengths (Å) and angles (deg ) for 1 .....                                                                                                                         | 5  |
| Table S2. Selected bond lengths (Å) and angles (deg ) for 2 .....                                                                                                                         | 6  |
| Figure S1. (a) A view of the molecule structure of 1 (b) the packing structure of 1 along<br>c axis .....                                                                                 | 7  |
| Figure S3. TGA curve for 2 .....                                                                                                                                                          | 9  |
| Figure S4. Variable temperature powder X-ray diffraction patterns for 2. ....                                                                                                             | 9  |
| Figure S5. Powder X-ray diffraction patterns for 1 after treatment in room temperature<br>acid aqueous and boiling water for 7 days. ....                                                 | 10 |
| Fig. S6. The PXRD patterns for 2 measured during chemical stability tests. (a) In<br>refluxing toluene at 110°C for up to 7 days. (b) In refluxing EtOH at 80°C for up to 7<br>days ..... | 11 |
| Figure S7: CO <sub>2</sub> adsorption isotherm at 298 K of MOF 2 and 2 after soaking in boiling<br>water for 7 days. ....                                                                 | 12 |
| Table S3. CO <sub>2</sub> adsorption capacities of phosphonate-based porous materials. ....                                                                                               | 13 |
| Table S4. CO <sub>2</sub> adsorption and selectivity capacities of some ZIF Materials at 298 K....                                                                                        | 13 |
| 4. References .....                                                                                                                                                                       | 14 |

## 1. General

All reagents were purchased from commercial sources and used without further purification. 4-(1,2,4-triazol-4-yl)phenylphosphonic acid ( $H_2ptz$ ) was prepared as shown in Scheme S1.  $^1H$ -NMR spectra were recorded on a JEOL ECA NMR spectrometer (400 MHz), chemical shifts (in ppm) were referenced to tetramethylsilane ( $\delta = 0$  ppm) in  $D_2O$  as an internal standard. Fourier transform infrared (FT IR) were recorded on a Nicolet 470 FT-IR spectrometer in the range  $4000-400\text{ cm}^{-1}$ . C, H, and N elemental analyses were determined on the Elemental Vario EL III. The phase purity of the samples was confirmed by powder X-ray diffraction (PXRD) collected on a Bruker D8 powder diffractometer with  $Cu-K\alpha$  radiation ( $\lambda = 1.5406\text{ \AA}$ ). Thermogravimetry (TG) studies were carried out on a TGA/SDTA 851 thermoanalyzer in the temperature range of  $30-800\text{ }^\circ\text{C}$  under  $N_2$  flow at a heating rate of  $10\text{ }^\circ\text{C min}^{-1}$ .  $CO_2$  and  $N_2$  adsorption were performed on ASAP 2020 gas adsorption analyzer. Samples were activated at  $120\text{ }^\circ\text{C}$  for 8 h before gas adsorption.

## 2. Experiment details

$H_2ptz$  was synthesized according to the route shown in scheme S1.

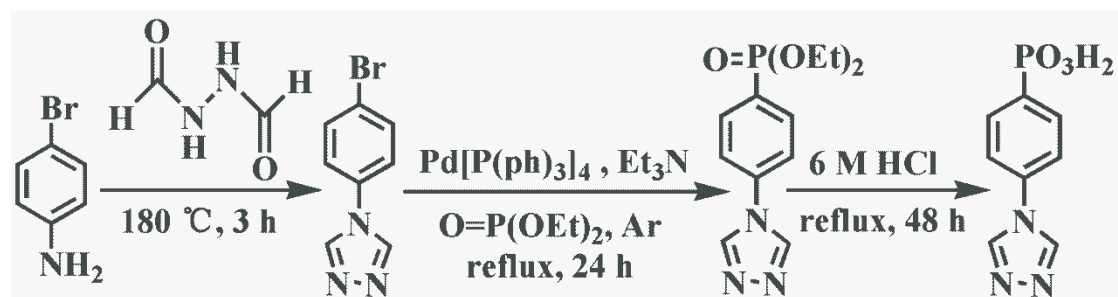

Scheme S1. Synthesis process of the ligand  $H_2ptz$ .

Synthesis of  $H_2ptz$ : The first step, a mixture of 4-bromoaniline (17.3 g, 0.1 mol) and  $N,N'$ -diformylhydrazine (8.8 g, 0.1 mol) was heated at  $180\text{ }^\circ\text{C}$  for 3 h. After cooling

down to room temperature and concentrating under vacuum, the residue was purified by flash chromatography to afford 10 g (45%) of 4-(4-bromophenyl)-1,2,4-triazole. Next step, a mixture of 4-(4-bromophenyl)-1,2,4-triazole (10 g, 45 mmol), diethyl phosphite (7.0 g, 51 mmol), triethylamine (6.0 g, 59 mmol), tetrakis(triphenylphosphine)palladium(0) (3.0 g, 2.6 mmol) was added to the solution of toluene (200 mL), after stirring at 90 °C for 24 h under argon, the mixture was cooled to room temperature and concentrated under vacuum, the residue was purified by flash chromatography. Last step, diethyl 4-(1,2,4-triazol-4-yl)phenylphosphonate was hydrolyzed in 6 M HCl solution at 110 °C for 48 h. 5.5 g of H<sub>2</sub>ptz was obtained with yield of 55%. <sup>1</sup>H NMR (400 MHz, D<sub>2</sub>O): δ = 7.74 (d, J = 7.8 Hz, 2H), δ = 7.96-7.97 (m, 2H), δ = 9.51 (s, 2H). FT IR frequencies (KBr) (cm<sup>-1</sup>): 3122 (w), 3043 (w), 2582 (m), 1562 (s), 1535 (w), 1362 (w), 1228 (w), 1186 (m), 1138 (s), 1097 (m), 1022 (m), 983 (m), 924 (s), 836 (m), 745 (m), 623 (w), 566 (m), 540 (m), 482 (w), 434 (m).

Synthesis of [Ni<sub>3</sub>(Hptz)<sub>6</sub>·6H<sub>2</sub>O] · 12H<sub>2</sub>O (1): A mixture of NiSO<sub>4</sub>·6H<sub>2</sub>O (0.040 g, 0.15 mmol), H<sub>2</sub>ptz (0.068 g, 0.3 mmol), and deionized water (5 mL) was placed in a teflon-lined stainless steel autoclave (15 mL) and was stirred at room temperature for 1 h (The pH value was 1.0). The mixture was then heated at 180 °C for 24 h, followed by cooling down to room temperature. Light purple block crystals were collected by filtration (Yield 61% based on H<sub>2</sub>ptz). Elemental analysis calcd. for C<sub>48</sub>H<sub>78</sub>N<sub>18</sub>Ni<sub>3</sub>O<sub>36</sub>P<sub>6</sub> (1845.23): C, 31.24; H, 4.26; N, 13.66 %. Found: C, 31.11; H, 4.45; N, 13.79 %.

Synthesis of [Ni(Hptz)<sub>2</sub>]·10H<sub>2</sub>O (2): A mixture of [Ni<sub>3</sub>(Hptz)<sub>6</sub>·6H<sub>2</sub>O] · 12H<sub>2</sub>O (1) (0.047 g, 0.025 mmol) and aqueous HOAc (5 mL, pH = 3.0) was placed in a teflon-lined stainless steel autoclave (15 mL) and was stirred at room temperature for 1 h. The mixture was then heated at 180 °C for 7 h, followed by cooling down to room temperature. Green block crystals were collected by filtration (Yield 62%, based on 1). Elemental analysis calcd. for C<sub>16</sub>H<sub>34</sub>N<sub>6</sub>NiO<sub>16</sub>P<sub>2</sub> (687.14): C, 27.97; H, 4.99; N, 12.23 %. Found: C, 27.91; H, 5.05; N, 12.27 %.

### 3. Single-crystal X-ray crystallography

Single crystal data of 1 and 2 were collected at room temperature using a Bruker APEX diffractometer equipped with a normal focus, 3.0 kW sealed tube X-ray source (Mo K $\alpha$  radiation,  $\lambda = 0.71073 \text{ \AA}$ ). Data reduction and cell refinement were performed with the SAINT program,<sup>S1</sup> and the absorption correction program SADABS was employed to correct the data for absorption effects. The structures were solved by direct methods and refined using full-matrix least-squares treatment (SHELXTL-97)<sup>S2</sup> with atomic coordinates and anisotropic thermal parameters for all non-hydrogen atoms. The hydrogen atoms on the phenyl were theoretically added. O-bonded H atoms were placed in idealized positions and constrained to ride on their parent atoms. Selected bond distances and bond angles are given in Table S1 and Table S2.

**Table S1. Selected bond lengths (Å) and angles (deg) for 1**

| 1                   |            |                     |            |
|---------------------|------------|---------------------|------------|
| Ni(1)-N(1)#1        | 2.098(3)   | N(1)-Ni(1)-N(1)#4   | 180.00(18) |
| Ni(1)-N(1)#2        | 2.098(3)   | N(1)#1-Ni(1)-N(1)#5 | 90.43(11)  |
| Ni(1)-N(1)#3        | 2.098(3)   | N(1)#2-Ni(1)-N(1)#5 | 89.57(11)  |
| Ni(1)-N(1)          | 2.098(3)   | N(1)#3-Ni(1)-N(1)#5 | 180.00(17) |
| Ni(1)-N(1)#4        | 2.098(3)   | N(1)-Ni(1)-N(1)#5   | 90.43(11)  |
| Ni(1)-N(1)#5        | 2.098(3)   | N(1)#4-Ni(1)-N(1)#5 | 89.57(11)  |
| Ni(2)-O(4)#1        | 2.053(3)   | O(4)#1-Ni(2)-O(4)#5 | 87.25(12)  |
| Ni(2)-O(4)#5        | 2.053(3)   | O(4)#1-Ni(2)-O(4)   | 87.25(12)  |
| Ni(2)-O(4)          | 2.053(3)   | O(4)#5-Ni(2)-O(4)   | 87.25(12)  |
| Ni(2)-N(2)#1        | 2.056(3)   | O(4)#1-Ni(2)-N(2)#1 | 90.45(13)  |
| Ni(2)-N(2)#5        | 2.056(3)   | O(4)#5-Ni(2)-N(2)#1 | 91.07(13)  |
| Ni(2)-N(2)          | 2.056(3)   | O(4)-Ni(2)-N(2)#1   | 177.21(12) |
|                     |            | O(4)#1-Ni(2)-N(2)#5 | 177.21(12) |
| N(1)#1-Ni(1)-N(1)#2 | 180.00(19) | O(4)#5-Ni(2)-N(2)#5 | 90.45(13)  |
| N(1)#1-Ni(1)-N(1)#3 | 89.57(11)  | O(4)-Ni(2)-N(2)#5   | 91.07(13)  |
| N(1)#2-Ni(1)-N(1)#3 | 90.43(11)  | N(2)#1-Ni(2)-N(2)#5 | 91.17(12)  |
| N(1)#1-Ni(1)-N(1)   | 90.43(11)  | O(4)#1-Ni(2)-N(2)   | 91.07(13)  |
| N(1)#2-Ni(1)-N(1)   | 89.57(11)  | O(4)#5-Ni(2)-N(2)   | 177.21(12) |
| N(1)#3-Ni(1)-N(1)   | 89.57(11)  | O(4)-Ni(2)-N(2)     | 90.45(13)  |
| N(1)#1-Ni(1)-N(1)#4 | 89.57(11)  | N(2)#1-Ni(2)-N(2)   | 91.17(12)  |
| N(1)#2-Ni(1)-N(1)#4 | 90.43(11)  | N(2)#5-Ni(2)-N(2)   | 91.17(12)  |
| N(1)#3-Ni(1)-N(1)#4 | 90.43(11)  |                     |            |

Symmetry transformations used to generate equivalent atoms: #1  $-x+y+2, -x+1, z$   
 #2  $x-y, x-1, -z$  #3  $y+1, -x+y+1, -z$  #4  $-x+2, -y, -z$  #5  $-y+1, x-y-1, z$

**Table S2. Selected bond lengths (Å) and angles (deg) for 2**

| 2                   |            |                     |            |
|---------------------|------------|---------------------|------------|
| Ni(1)-O(2)#1        | 2.075(5)   | O(2)#2-Ni(1)-N(3)#3 | 93.6(2)    |
| Ni(1)-O(2)#2        | 2.075(5)   | N(3)-Ni(1)-N(3)#3   | 180.000(1) |
| Ni(1)-N(3)          | 2.082(6)   | O(2)#1-Ni(1)-N(1)#3 | 85.7(2)    |
| Ni(1)-N(3)#3        | 2.082(6)   | O(2)#2-Ni(1)-N(1)#3 | 94.3(2)    |
| Ni(1)-N(1)#3        | 2.085(6)   | N(3)-Ni(1)-N(1)#3   | 88.1(2)    |
| Ni(1)-N(1)          | 2.085(6)   | N(3)#3-Ni(1)-N(1)#3 | 91.9(2)    |
|                     |            | O(2)#1-Ni(1)-N(1)   | 94.3(2)    |
| O(2)#1-Ni(1)-O(2)#2 | 180.00(17) | O(2)#2-Ni(1)-N(1)   | 85.7(2)    |
| O(2)#1-Ni(1)-N(3)   | 93.6(2)    | N(3)-Ni(1)-N(1)     | 91.9(2)    |
| O(2)#2-Ni(1)-N(3)   | 86.4(2)    | N(3)#3-Ni(1)-N(1)   | 88.1(2)    |
| O(2)#1-Ni(1)-N(3)#3 | 86.4(2)    | N(1)#3-Ni(1)-N(1)   | 180.0(3)   |

Symmetry transformations used to generate equivalent atoms: #1  $x+1,y,z$   
#2  $-x,-y,-z+2$  #3  $-x+1,-y,-z+2$  #4  $x-1,y,z$  #5  $x,-y+1/2,z$  #6  $x,-y+3/2,z$

**Figure S1. (a) A view of the molecule structure of 1 (b) the packing structure of 1 along c axis.**

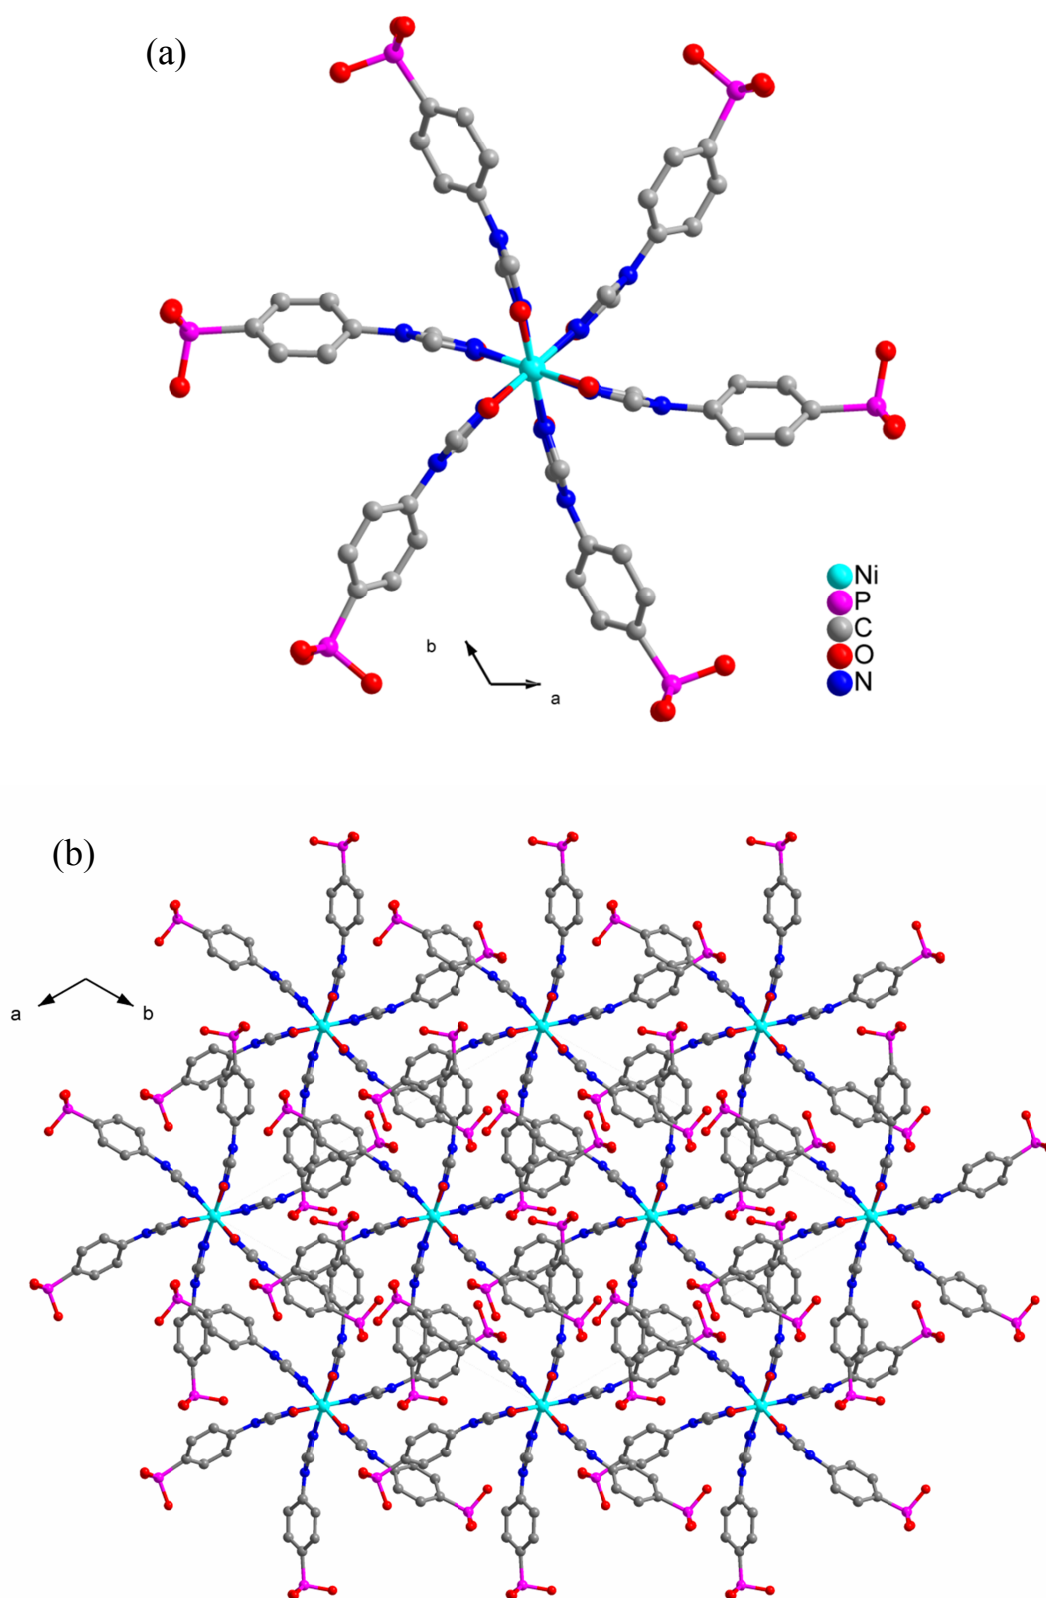

**Figure S2. (a) The structural motif of 2 (symmetry code: A: 1+x, y, z; B: -x, -y, 2-z; C: 1-x, -y, 2-z; D: x, 1/2-y, z). (b) view of the 2×2 packing structure and hydrogen bonds of 2 along b axis.**

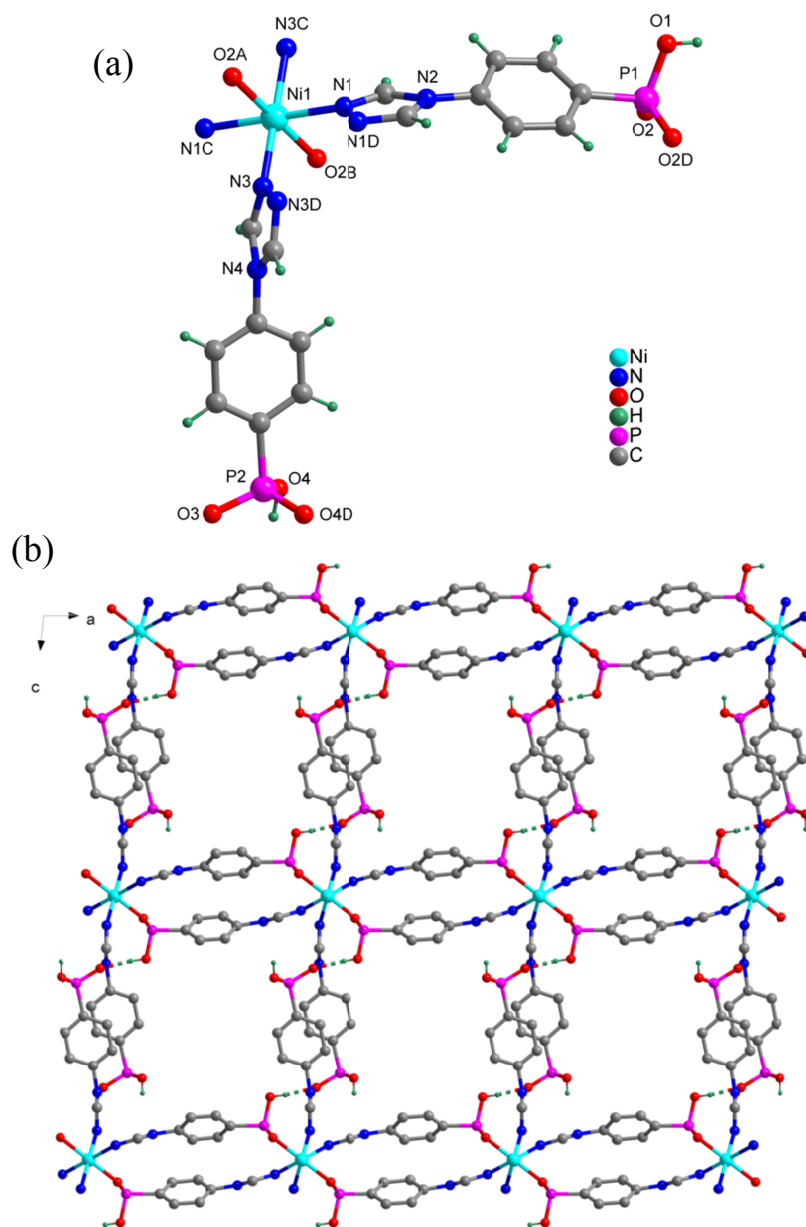

Hydrogen bonds of 2

| D-H...A             | d(D-H) | d(H...A) | d(D...A)  | <(DHA) |
|---------------------|--------|----------|-----------|--------|
| O(1)-H(1A)...O(3)#7 | 0.82   | 1.70     | 2.519(10) | 174.7  |

Symmetry transformations used to generate equivalent atoms: #7 x-1,y,z+1.



**Figure S3. TGA curve for 2.**

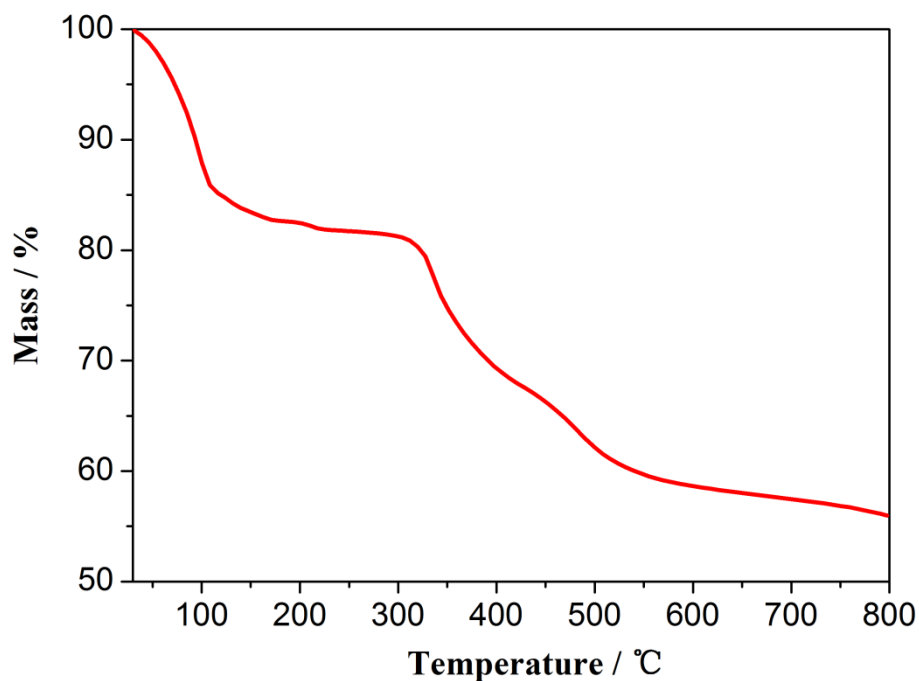

**Figure S4. Variable temperature powder X-ray diffraction patterns for 2.**

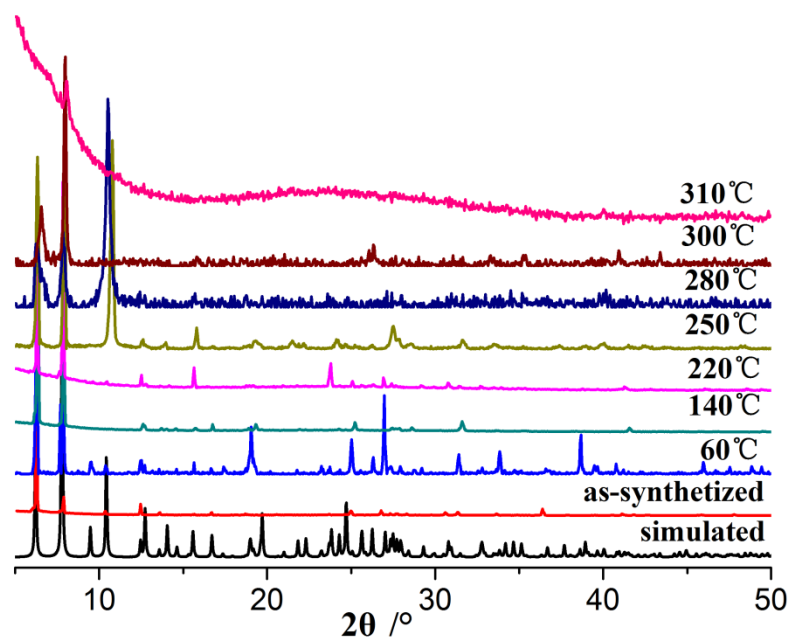

**Figure S5. Powder X-ray diffraction patterns for 1 after treatment in room temperature acid aqueous and boiling water for 7 days.**

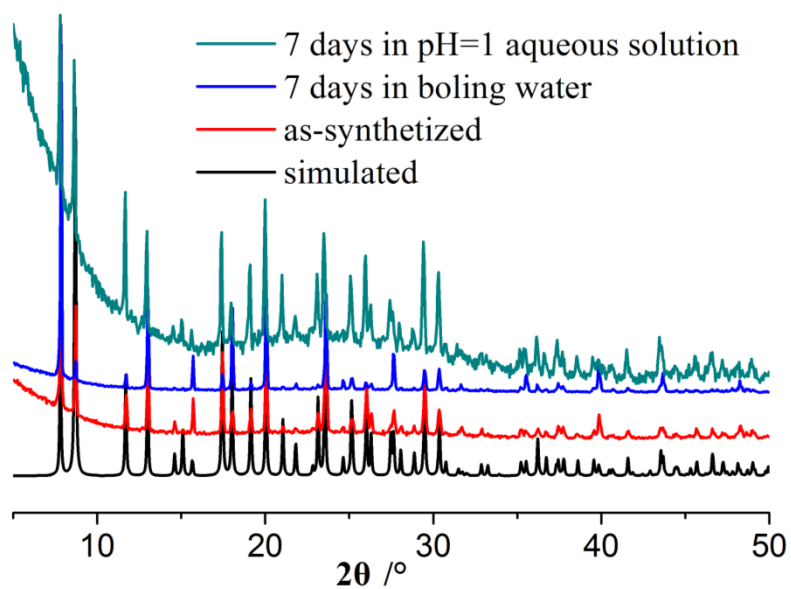

**Fig. S6. The PXRD patterns for 2 measured during chemical stability tests. (a) In refluxing toluene at 110°C for up to 7 days. (b) In refluxing EtOH at 80°C for up to 7 days.**

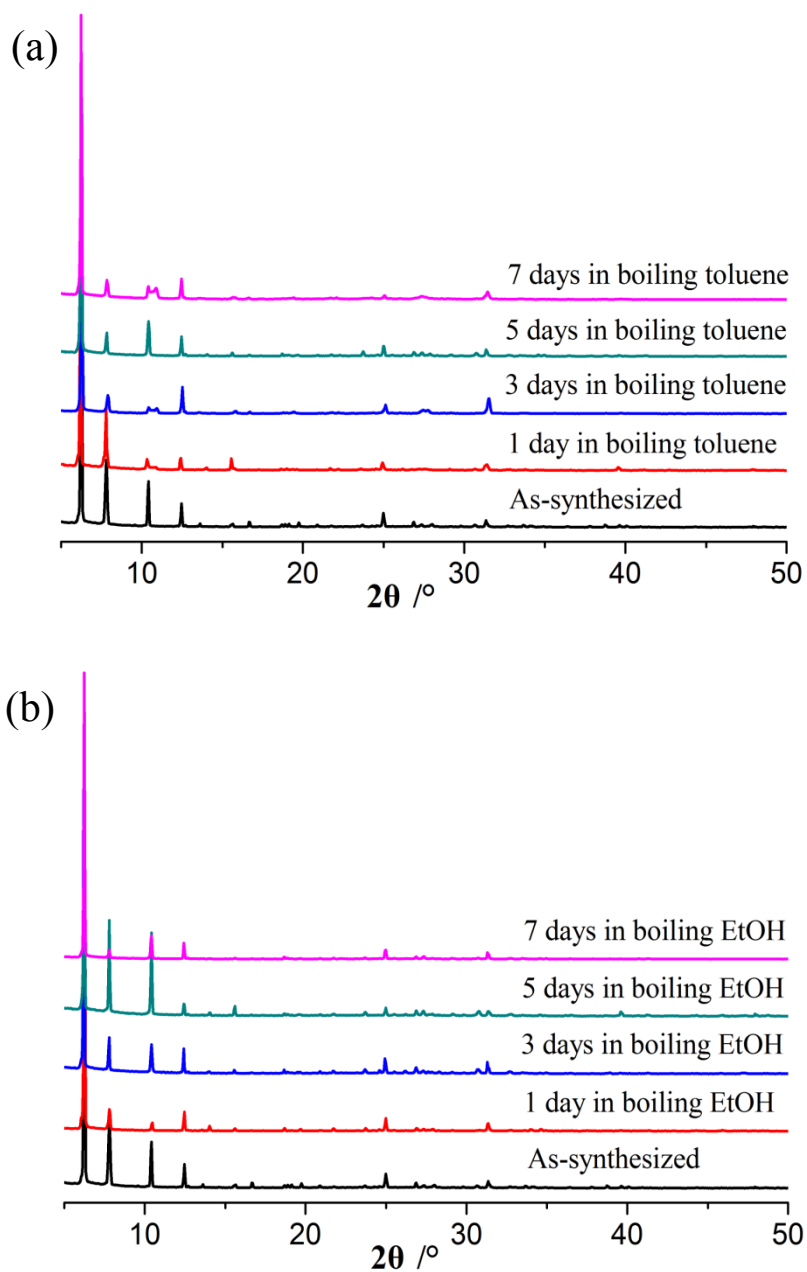

**Figure S7: CO<sub>2</sub> adsorption isotherm at 298 K of MOF 2 and 2 after soaking in boiling water for 7 days.**

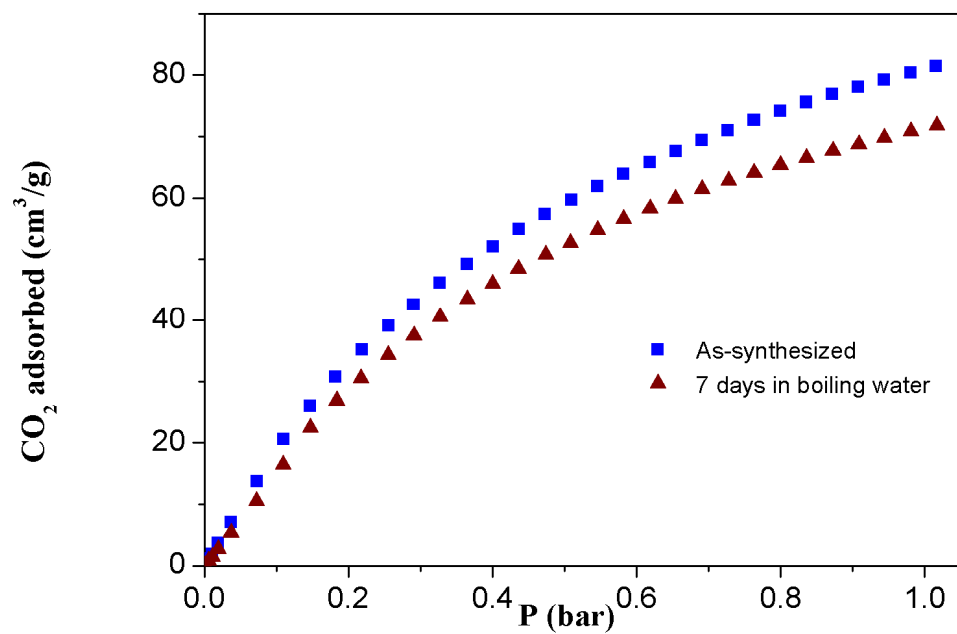

**Table S3. CO<sub>2</sub> adsorption capacities of phosphonate-based porous materials.**

| Chemical formula                                  | Common name | Capacity (wt %) | Pressure (bar) | Temperature (K) | Ref |
|---------------------------------------------------|-------------|-----------------|----------------|-----------------|-----|
|                                                   | HMSnP-1     | 4.0             | 1              | 298             | S3  |
| Zn(1,4-benzenediphosphonate-bis(monoethyl ester)) | Zn(BDPEt)   | 4.7             | 1              | 273             | S4  |
| Cu(1,4-benzenediphosphonate-bis(monoalkyl ester)) | Cu(BDPMe)   | 6.1             | 1              | 273             | S5  |
| Ni <sub>2</sub> (pbmp)                            | Ni-STA-12   | 9.9             | 1              | 304             | S6  |

**Table S4. CO<sub>2</sub> adsorption and selectivity capacities of some ZIF Materials at 298 K.**

| Common name         | CO <sub>2</sub> uptake at 1 bar (mmol g <sup>-1</sup> ) | CO <sub>2</sub> /N <sub>2</sub> | Common name            | CO <sub>2</sub> uptake at 1 bar (mmol g <sup>-1</sup> ) | CO <sub>2</sub> /N <sub>2</sub> |
|---------------------|---------------------------------------------------------|---------------------------------|------------------------|---------------------------------------------------------|---------------------------------|
| ZIF-68 <sup>a</sup> | 1.7                                                     | 18.7                            | ZIF-81 <sup>a</sup>    | 1.7                                                     | 23.8                            |
| ZIF-69 <sup>a</sup> | 1.8                                                     | 19.9                            | ZIF-82 <sup>a</sup>    | 2.4                                                     | 35.3                            |
| ZIF-70 <sup>a</sup> | 2.5                                                     | 17.3                            | ZIF-95 <sup>b</sup>    | 0.9                                                     | 18 ± 1.7                        |
| ZIF-78 <sup>a</sup> | 2.3                                                     | 50.1                            | ZIF-100 <sup>b,c</sup> | 1.5                                                     | 24 ± 2.4                        |
| ZIF-79 <sup>a</sup> | 1.5                                                     | 23.2                            |                        |                                                         |                                 |

<sup>a</sup>Reported in ref S7. <sup>b</sup>Reported in ref S8. <sup>c</sup>Adsorption data measured at 273 K.

## 4. References

- (S1) G. M. Sheldrick, *SADABS, Program for Empirical Absorption Correction of Area Detector Data*; University of Gottingen: Gottingen, 1996.
- (S2) G. M. Sheldrick, *SHELXS 97, Program for Crystal Structure Refinement*; University of Gottingen: Gottingen, 1997.
- (S3) A. Dutta, M. Pramanik, A. K. Patra, M. Nandi, H. Uyama and A. Bhaumik, *Chem. Commun.*, 2012, **48**, 6738–6740.
- (S4) S. S. Iremonger, J. Liang, R. Vaidhyanathan and G. K. H. Shimizu, *Chem. Commun.*, 2011, **47**, 4430–4432.
- (S5) S. S. Iremonger, J. Liang, R. Vaidhyanathan, I. Martens, G. K. H. Shimizu, Thomas, D. Daff, M. Z. Aghaji, S. Yeganegi, and T. K. Woo, *J. Am. Chem. Soc.*, 2011, **133**, 20048–20051.
- (S6) K. Sumida, D. L. Rogow, J. A. Mason, T. M. McDonald, E. D. Bloch, Z. R. Herm, T. H. Bae, and J. R. Long, *Chem. Rev.*, 2012, **112**, 724–781.
- (S7) R. Banerjee, H. Furukawa, D. Britt, C. Knobler, M. O’Keeffe, and O. M. Yaghi, *J. Am. Chem. Soc.*, 2009, **131**, 3875–3877.
- (S8) B. Wang, A. P. Cote, H. Furukawa, M. O’Keeffe, O. M. Yaghi, *Nature*, 2008, **453**, 207–212.
